# Supplementary material for: The impact of bacterial exposure in early life on lung surfactant gene expression, function and respiratory rate in germ-free mice
Source: Front Microbiomes. 2023 Mar 6;2:1085508. doi: 10.3389/frmbi.2023.1085508 (PMC12993578; doi:10.3389/frmbi.2023.1085508)
Supplement: Supplementary file 7 [file Table_4.xlsx]

## Sheet: Sheet1
Input: Genes significant in BI04 vs GF (female or male combined)
Analysis Type:	PANTHER Overrepresentation Test (Released 20200728)
Annotation Version and Release Date:	Gene Ontology Biological Process Complete
Analyzed List:	upload_1 (Homo sapiens)
Reference List:	Homo sapiens (all genes in database)
Test Type:	FISHER
Correction:	FDR
GO biological process complete	Homo sapiens - REFLIST (20851)	upload_1 (323)	upload_1 (expected)	upload_1 (over/under)	upload_1 (fold Enrichment)	upload_1 (raw P-value)	upload_1 (FDR)
DNA unwinding involved in DNA replication (GO:0006268)	16	6	0.25	+	24.21	7.31e-07	0.000446
mitotic DNA replication (GO:1902969)	12	4	0.19	+	21.52	8.37e-05	0.0225
DNA ligation (GO:0006266)	14	4	0.22	+	18.44	0.000137	0.0335
nuclear DNA replication (GO:0033260)	56	11	0.87	+	12.68	5.28e-09	1.05e-05
cell cycle DNA replication (GO:0044786)	57	11	0.88	+	12.46	6.21e-09	1.09e-05
DNA replication initiation (GO:0006270)	32	6	0.5	+	12.1	2.2e-05	0.00831
base-excision repair (GO:0006284)	48	6	0.74	+	8.07	0.000168	0.0403
DNA-dependent DNA replication (GO:0006261)	141	14	2.18	+	6.41	1.17e-07	0.000143
DNA replication (GO:0006260)	225	21	3.49	+	6.03	2.21e-10	5.84e-07
mitotic sister chromatid segregation (GO:0000070)	111	10	1.72	+	5.82	1.68e-05	0.00703
G1/S transition of mitotic cell cycle (GO:0000082)	129	11	2	+	5.5	1.04e-05	0.0047
cell cycle G1/S phase transition (GO:0044843)	131	11	2.03	+	5.42	1.19e-05	0.00523
mitotic nuclear division (GO:0140014)	170	14	2.63	+	5.32	9.57e-07	0.000562
sister chromatid segregation (GO:0000819)	139	11	2.15	+	5.11	1.99e-05	0.00809
mitotic spindle organization (GO:0007052)	166	13	2.57	+	5.06	3.93e-06	0.00208
RNA export from nucleus (GO:0006405)	135	10	2.09	+	4.78	7.96e-05	0.0221
microtubule cytoskeleton organization involved in mitosis (GO:1902850)	189	14	2.93	+	4.78	3.07e-06	0.00168
regulation of gene expression, epigenetic (GO:0040029)	172	12	2.66	+	4.5	2.72e-05	0.00959
nuclear export (GO:0051168)	166	11	2.57	+	4.28	9.05e-05	0.0239
nuclear division (GO:0000280)	305	20	4.72	+	4.23	1.52e-07	0.000161
mitotic prometaphase (GO:0000236)	170	11	2.63	+	4.18	0.000111	0.0278
mitotic cell cycle process (GO:1903047)	680	43	10.53	+	4.08	2.2e-14	3.48e-10
spindle organization (GO:0007051)	229	14	3.55	+	3.95	2.38e-05	0.00879
organelle fission (GO:0048285)	334	20	5.17	+	3.87	5.92e-07	0.000408
mitotic cell cycle (GO:0000278)	757	45	11.73	+	3.84	4.14e-14	3.28e-10
cell division (GO:0051301)	501	29	7.76	+	3.74	3.3e-09	7.47e-06
mitotic cell cycle phase transition (GO:0044772)	290	16	4.49	+	3.56	2.1e-05	0.00832
chromosome segregation (GO:0007059)	274	15	4.24	+	3.53	4.13e-05	0.0131
cell cycle phase transition (GO:0044770)	298	16	4.62	+	3.47	2.87e-05	0.0099
DNA conformation change (GO:0071103)	309	16	4.79	+	3.34	4.34e-05	0.013
cell cycle process (GO:0022402)	1059	50	16.4	+	3.05	5.49e-12	2.9e-08
microtubule cytoskeleton organization (GO:0000226)	578	25	8.95	+	2.79	6.78e-06	0.00336
cell cycle (GO:0007049)	1383	57	21.42	+	2.66	2.68e-11	8.49e-08
DNA repair (GO:0006281)	522	21	8.09	+	2.6	0.0001	0.0257
chromosome organization (GO:0051276)	1063	40	16.47	+	2.43	3.81e-07	0.000302
DNA metabolic process (GO:0006259)	769	28	11.91	+	2.35	4.32e-05	0.0135
regulation of cell cycle process (GO:0010564)	769	28	11.91	+	2.35	4.32e-05	0.0132
cellular protein-containing complex assembly (GO:0034622)	824	29	12.76	+	2.27	7.43e-05	0.021
protein-containing complex assembly (GO:0065003)	1302	42	20.17	+	2.08	9.08e-06	0.00424
regulation of cell cycle (GO:0051726)	1209	39	18.73	+	2.08	2.16e-05	0.00836
cytoskeleton organization (GO:0007010)	1224	39	18.96	+	2.06	2.61e-05	0.00941
cellular component assembly (GO:0022607)	2394	69	37.09	+	1.86	4.54e-07	0.000343
macromolecule biosynthetic process (GO:0009059)	1682	48	26.06	+	1.84	5.29e-05	0.0152
protein-containing complex subunit organization (GO:0043933)	1547	44	23.96	+	1.84	0.000112	0.0277
cellular component biogenesis (GO:0044085)	2654	73	41.11	+	1.78	1.36e-06	0.000771
organelle organization (GO:0006996)	3586	94	55.55	+	1.69	1.65e-07	0.000164
nucleobase-containing compound metabolic process (GO:0006139)	2743	71	42.49	+	1.67	1.49e-05	0.00637
cellular biosynthetic process (GO:0044249)	2703	69	41.87	+	1.65	3.96e-05	0.0128
organic substance biosynthetic process (GO:1901576)	2799	71	43.36	+	1.64	3.6e-05	0.0119
biosynthetic process (GO:0009058)	2861	72	44.32	+	1.62	3.12e-05	0.0105
cellular nitrogen compound metabolic process (GO:0034641)	3405	85	52.75	+	1.61	6.89e-06	0.00331
heterocycle metabolic process (GO:0046483)	2937	73	45.5	+	1.6	5.18e-05	0.0152
cellular aromatic compound metabolic process (GO:0006725)	2987	73	46.27	+	1.58	8.27e-05	0.0226
organic cyclic compound metabolic process (GO:1901360)	3220	77	49.88	+	1.54	9.93e-05	0.0258
cellular component organization (GO:0016043)	5703	134	88.34	+	1.52	5.53e-08	8.77e-05
cellular component organization or biogenesis (GO:0071840)	5922	137	91.74	+	1.49	1.07e-07	0.000154
cellular macromolecule metabolic process (GO:0044260)	5145	117	79.7	+	1.47	4.89e-06	0.0025
macromolecule metabolic process (GO:0043170)	6333	142	98.1	+	1.45	3.66e-07	0.000306
nitrogen compound metabolic process (GO:0006807)	7091	154	109.85	+	1.4	5.84e-07	0.000421
cellular metabolic process (GO:0044237)	7784	168	120.58	+	1.39	1.14e-07	0.000151
primary metabolic process (GO:0044238)	7578	163	117.39	+	1.39	3.42e-07	0.000301
organic substance metabolic process (GO:0071704)	8011	171	124.1	+	1.38	1.82e-07	0.00017
metabolic process (GO:0008152)	8592	181	133.1	+	1.36	1.34e-07	0.000152
cellular process (GO:0009987)	15598	290	241.63	+	1.2	2.17e-11	8.59e-08
biological_process (GO:0008150)	18012	307	279.02	+	1.1	6.32e-07	0.000418
Unclassified (UNCLASSIFIED)	2839	16	43.98	-	0.36	6.32e-07	0.000401
Analysis Type:	PANTHER Overrepresentation Test (Released 20200728)
Annotation Version and Release Date:	Gene Ontology Molecular Function Complete
Analyzed List:	upload_1 (Homo sapiens)
Reference List:	Homo sapiens (all genes in database)
Test Type:	FISHER
Correction:	FDR
GO molecular function complete	Homo sapiens - REFLIST (20851)	upload_1 (323)	upload_1 (expected)	upload_1 (over/under)	upload_1 (fold Enrichment)	upload_1 (raw P-value)	upload_1 (FDR)
single-stranded DNA helicase activity (GO:0017116)	19	5	0.29	+	16.99	2.68e-05	0.0183
telomeric DNA binding (GO:0042162)	36	6	0.56	+	10.76	3.97e-05	0.0173
single-stranded DNA binding (GO:0003697)	117	10	1.81	+	5.52	2.57e-05	0.0205
heat shock protein binding (GO:0031072)	130	10	2.01	+	4.97	5.92e-05	0.0236
microtubule binding (GO:0008017)	273	15	4.23	+	3.55	3.97e-05	0.0189
tubulin binding (GO:0015631)	378	19	5.86	+	3.24	1.25e-05	0.012
heterocyclic compound binding (GO:1901363)	5977	126	92.59	+	1.36	7.11e-05	0.0261
organic cyclic compound binding (GO:0097159)	6066	127	93.97	+	1.35	9.74e-05	0.031
ion binding (GO:0043167)	6397	133	99.1	+	1.34	7.55e-05	0.0258
protein binding (GO:0005515)	14393	270	222.96	+	1.21	3.88e-09	9.28e-06
binding (GO:0005488)	16634	300	257.68	+	1.16	1.04e-10	4.96e-07
molecular_function (GO:0003674)	18383	314	284.77	+	1.1	7.92e-09	9.46e-06
molecular transducer activity (GO:0060089)	1518	6	23.52	-	0.26	2.81e-05	0.0168
signaling receptor activity (GO:0038023)	1518	6	23.52	-	0.26	2.81e-05	0.0149
Unclassified (UNCLASSIFIED)	2468	9	38.23	-	0.24	7.92e-09	1.26e-05
Analysis Type:	PANTHER Overrepresentation Test (Released 20200728)
Annotation Version and Release Date:	Reactome Analysis
Analyzed List:	upload_1 (Homo sapiens)
Reference List:	Homo sapiens (all genes in database)
Test Type:	FISHER
Correction:	FDR
Reactome pathways	Homo sapiens - REFLIST (20851)	upload_1 (323)	upload_1 (expected)	upload_1 (over/under)	upload_1 (fold Enrichment)	upload_1 (raw P-value)	upload_1 (FDR)
Activation of the pre-replicative complex (R-HSA-68962)	33	7	0.51	+	13.69	2.18e-06	0.000996
DNA strand elongation (R-HSA-69190)	32	6	0.5	+	12.1	2.2e-05	0.00419
HDACs deacetylate histones (R-HSA-3214815)	60	8	0.93	+	8.61	8.97e-06	0.00256
Telomere Maintenance (R-HSA-157579)	63	8	0.98	+	8.2	1.24e-05	0.00284
Meiotic synapsis (R-HSA-1221632)	58	7	0.9	+	7.79	5.88e-05	0.00839
Meiotic recombination (R-HSA-912446)	56	6	0.87	+	6.92	0.000361	0.0317
Meiosis (R-HSA-1500620)	86	9	1.33	+	6.76	1.49e-05	0.00309
Base Excision Repair (R-HSA-73884)	70	7	1.08	+	6.46	0.000174	0.0189
DNA Damage/Telomere Stress Induced Senescence (R-HSA-2559586)	61	6	0.94	+	6.35	0.000549	0.0433
DNA Replication Pre-Initiation (R-HSA-69002)	84	8	1.3	+	6.15	8.23e-05	0.0104
Chromosome Maintenance (R-HSA-73886)	90	8	1.39	+	5.74	0.000129	0.0147
HCMV Late Events (R-HSA-9610379)	79	7	1.22	+	5.72	0.000345	0.0315
G1/S Transition (R-HSA-69206)	130	11	2.01	+	5.46	1.11e-05	0.00282
Resolution of Sister Chromatid Cohesion (R-HSA-2500257)	122	10	1.89	+	5.29	3.58e-05	0.00585
Mitotic G1 phase and G1/S transition (R-HSA-453279)	147	12	2.28	+	5.27	6.24e-06	0.00203
Reproduction (R-HSA-1474165)	112	9	1.73	+	5.19	0.000101	0.0122
DNA Replication (R-HSA-69306)	126	9	1.95	+	4.61	0.000233	0.0231
G2/M Checkpoints (R-HSA-69481)	150	10	2.32	+	4.3	0.00018	0.0186
RHO GTPases Activate Formins (R-HSA-5663220)	135	9	2.09	+	4.3	0.000376	0.0318
Mitotic Prometaphase (R-HSA-68877)	198	13	3.07	+	4.24	2.31e-05	0.00406
Cell Cycle Checkpoints (R-HSA-69620)	270	17	4.18	+	4.06	2.22e-06	0.000844
Cell Cycle, Mitotic (R-HSA-69278)	495	31	7.67	+	4.04	1.5e-10	1.71e-07
Cell Cycle (R-HSA-1640170)	600	35	9.29	+	3.77	5.74e-11	1.31e-07
Mitotic Metaphase and Anaphase (R-HSA-2555396)	194	11	3.01	+	3.66	0.000327	0.0311
M Phase (R-HSA-68886)	353	20	5.47	+	3.66	1.33e-06	0.000762
RHO GTPase Effectors (R-HSA-195258)	287	15	4.45	+	3.37	6.79e-05	0.00913
Signaling by Rho GTPases (R-HSA-194315)	417	19	6.46	+	2.94	4.52e-05	0.00689
Infectious disease (R-HSA-5663205)	465	18	7.2	+	2.5	0.000485	0.0396
Unclassified (UNCLASSIFIED)	10195	106	157.93	-	0.67	8.09e-09	6.16e-06
